# Supplementary material for: Chicken breast muscle hydrolysates ameliorate acute alcohol-induced liver injury in mice through alcohol dehydrogenase (ADH) activation and oxidative stress reduction
Source: Royal Society of Chemistry journal article supplement (doi:10.1039/c7fo01387f), 2017-12-08
Supplement: c7fo01387f1.pdf [file c7fo01387f1.pdf]

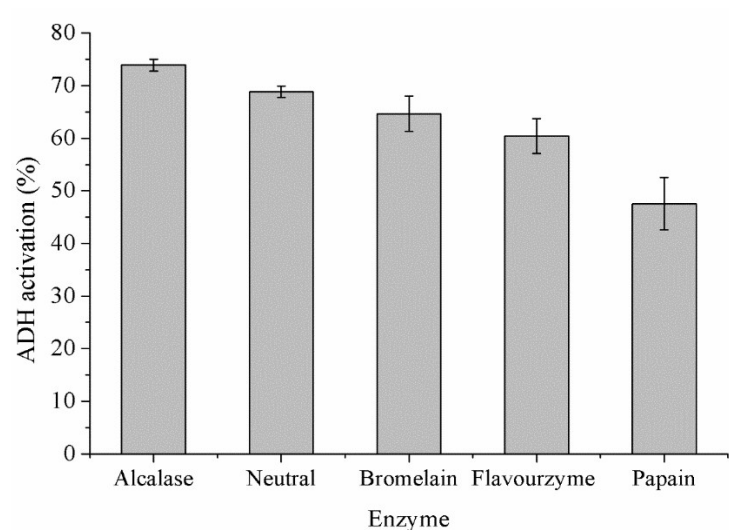

**Fig. S1** Effect CBMHs, hydrolyzed by different commercial enzymes, on ADH activation *in vitro* at a concentration of 1.0 mg/mL. Data was expressed as mean  $\pm$  SD (n=3).
